# Supplementary material for: Genetic variation in the immunoglobulin heavy chain locus shapes the human antibody repertoire
Source: PubMed Central journal article supplement (PMC10362067; doi:10.1038/s41467-023-40070-x), 2023-07-21
Supplement: 41467_2023_40070_MOESM3_ESM.pdf [file 41467_2023_40070_MOESM3_ESM.pdf]

## Description of Additional Supplementary Files

File Name: Supplementary Data 1

Description: Sample information with details regarding AIRR-seq and Pacific BioScience datasets

File Name: Supplementary Data 2

Description: Description of large IGH SVs

File Name: Supplementary Data 3

Description: Description of novel alleles

File Name: Supplementary Data 4

Description: Lead guQTL results

File Name: Supplementary Data 5

Description: Conditional guQTL results

File Name: Supplementary Data 6

Description: Statistics for allele distribution differences between donors partitioned by guQTL genotype

File Name: Supplementary Data 7

Description: IGHV and IGHC primers for AIRR-seq
